# Supplementary material for: Oral glutathione supplementation drastically reduces Helicobacter-induced gastric pathologies
Source: PubMed Central journal article supplement (PMC4735851; doi:10.1038/srep20169), 2016-02-02
Supplement: srep20169-s1.pdf [file srep20169-s1.pdf]

1 **ORAL GLUTATHIONE SUPPLEMENTATION DRASTICALLY REDUCES**  
2 ***HELICOBACTER*-INDUCED GASTRIC PATHOLOGIES**

3 Ellen De Bruyne, Richard Ducatelle, Dennis Foss, Margaret Sanchez, Myrthe Joosten, Guangzhi  
4 Zhang, Annemieke Smet, Frank Pasmans, Freddy Haesebrouck, Bram Flahou

5  
6 **Figure S1:** *Helicobacter suis* colonization in the antrum of experimentally infected Mongolian  
7 gerbils receiving a standard diet (Std), glutamine-supplemented diet (Gln) or glutathione  
8 supplemented diet (GSH).

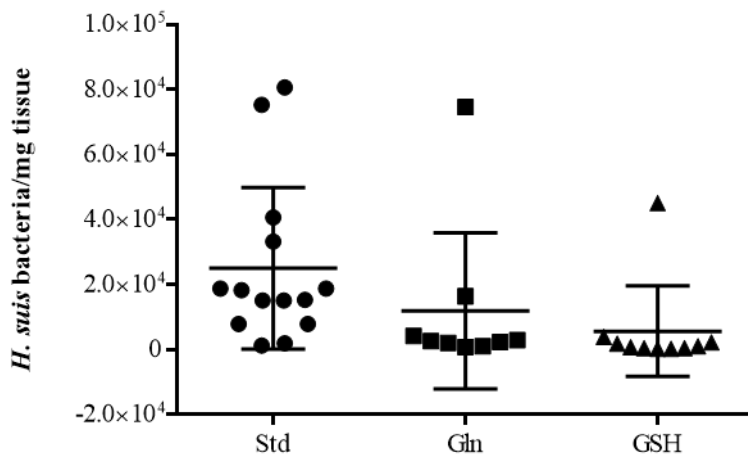

11 **FIGURE S2:** CD3 staining of the antrum of a control animal (A) and a *Helicobacter suis* infected  
12 animal (B), both receiving the standard diet. CD3 positive T-cells (brown) are only present in low  
13 numbers in the antrum of control animals receiving the standard diet (A). In contrast, they are  
14 abundantly present in the antrum of *Helicobacter suis* infected animals receiving the standard diet  
15 (B). Superficial lymphoid aggregates (\*) contain more CD3 negative T-cells, whereas deep  
16 lymphoid aggregates (°) are mainly composed of CD3 positive cells.

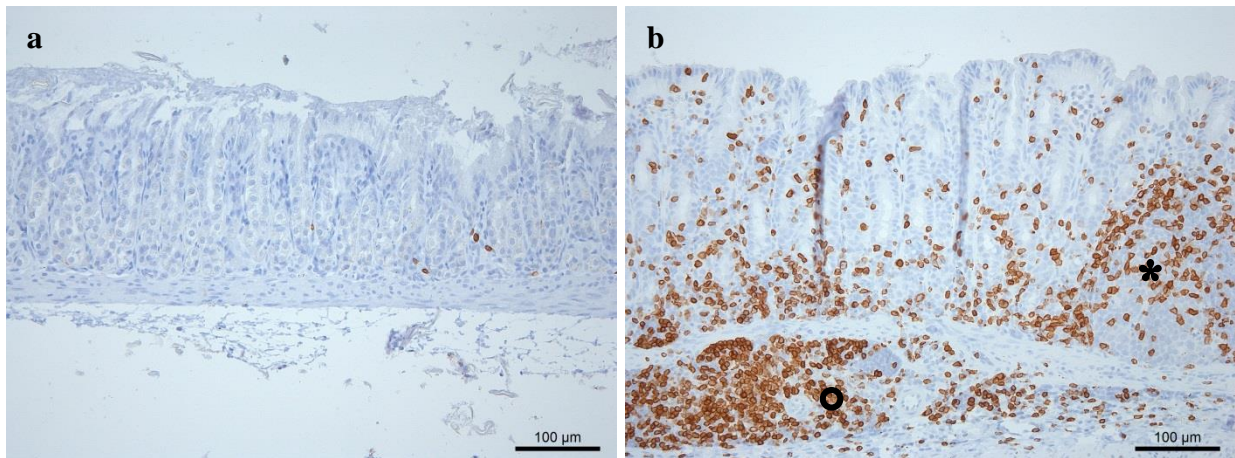

19 **FIGURE S3:** Immunohistochemical staining of the parietal cell hydrogen potassium ATPase.  $H^+$ ,  
20  $K^+$  ATPase-positive parietal cells (brown) in the antrum/antrum-corporum transition zone. A: control  
21 animals receiving the standard diet; B: *H. suis* infected animal with the standard diet; C: *H. suis*  
22 infected animal receiving the glutamine-supplemented diet; D: *H. suis* infected animal receiving  
23 the glutathione-supplemented diet. An abrupt loss of parietal cells is observed in *H. suis* infected  
24 animals receiving the standard diet and *H. suis* infected animals receiving the Gln-supplemented  
25 diet, but not in *H. suis* infected animals receiving the GSH-supplemented diet.

26

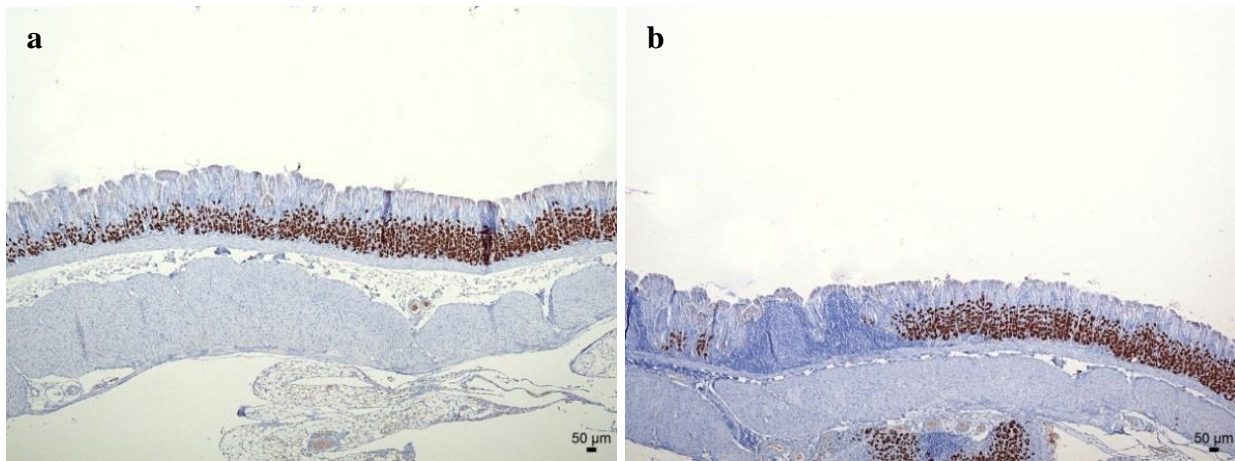

27

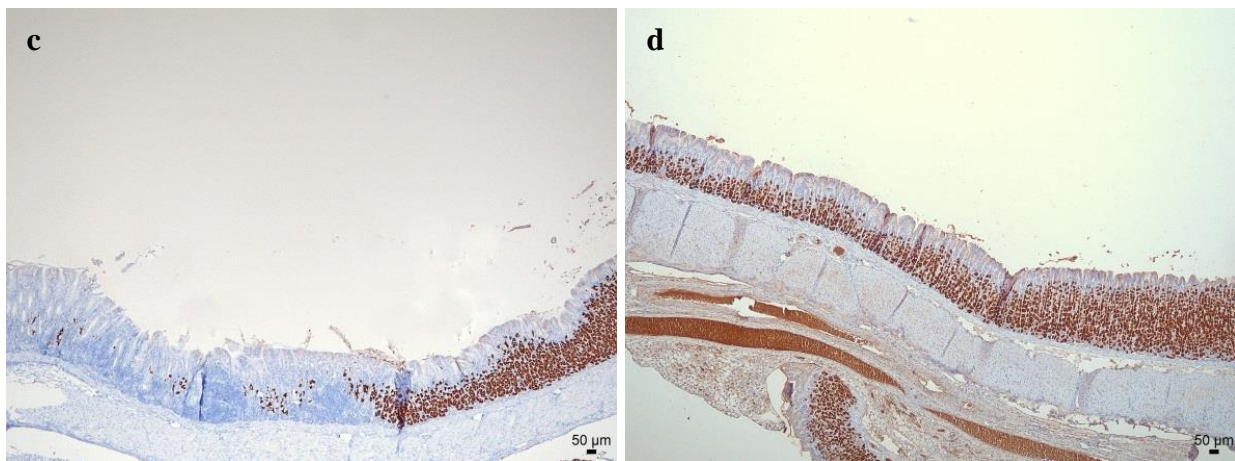

28

29 **Table S1:** The fold change of the metabolites that were significantly different in Minimal  
 30 Essential Medium (MEM) and/or Mueller Hinton Medium (MH) after 12, 18 and 24 hours of  
 31 incubation with *Helicobacter suis* compared to the 2 hour incubation point. Highlighted in green  
 32 are the metabolites that significantly decreased over time, highlighted in red are the values that  
 33 significantly increased. The p-value is given of each measurement.

| Name                   | MEM                 |             |                     |             |                     |             | MH                  |             |                     |             |                     |             |
|------------------------|---------------------|-------------|---------------------|-------------|---------------------|-------------|---------------------|-------------|---------------------|-------------|---------------------|-------------|
|                        | Hour 12 /<br>Hour 2 |             | Hour 18 /<br>Hour 2 |             | Hour 24 /<br>Hour 2 |             | Hour 12 /<br>Hour 2 |             | Hour 18 /<br>Hour 2 |             | Hour 24 /<br>Hour 2 |             |
|                        | Fold<br>Chan<br>ge  | P-<br>value | Fold<br>Chan<br>ge  | P-<br>value | Fold<br>Chan<br>ge  | P-<br>value | Fold<br>Chan<br>ge  | P-<br>value | Fold<br>Chan<br>ge  | P-<br>value | Fold<br>Chan<br>ge  | P-<br>value |
| Serine                 | 0.50                | 0.00        | 0.24                | 0.00        | 0.07                | 0.00        | 1.01                | 0.74        | 0.99                | 0.84        | 0.95                | 0.27        |
| Betaine                | 1.11                | 0.25        | 1.20                | 0.04        | 1.28                | 0.02        | 0.99                | 0.48        | 0.98                | 0.47        | 1.01                | 0.75        |
| Alanine                | 0.71                | 0.00        | 0.49                | 0.00        | 0.27                | 0.00        | 1.03                | 0.09        | 1.05                | 0.09        | 1.00                | 0.97        |
| Beta-alanine           | 0.85                | 0.46        | 0.99                | 0.80        | 1.18                | 0.39        | 1.05                | 0.64        | 0.97                | 0.95        | 1.11                | 0.60        |
| Aspartate              | 0.36                | 0.00        | 0.19                | 0.00        | 0.12                | 0.00        | 0.45                | 0.00        | 0.23                | 0.00        | 0.13                | 0.00        |
| Asparagine             | 0.02                | 0.00        | 0.02                | 0.00        | 0.02                | 0.00        | 0.20                | 0.00        | 0.05                | 0.00        | 0.03                | 0.00        |
| Glutamate              | 2.59                | 0.00        | 3.60                | 0.00        | 3.35                | 0.00        | 1.04                | 0.27        | 1.06                | 0.18        | 1.05                | 0.30        |
| Glutamine              | 0.41                | 0.00        | 0.11                | 0.00        | 0.00                | 0.00        | 0.64                | 0.00        | 0.34                | 0.00        | 0.12                | 0.00        |
| 3-methyl-2-oxovalerate | 3.94                | 0.00        | 5.23                | 0.00        | 5.75                | 0.00        | 1.92                | 0.00        | 2.34                | 0.00        | 2.51                | 0.00        |
| Isoleucine             | 0.92                | 0.06        | 0.90                | 0.03        | 0.92                | 0.01        | 1.05                | 0.19        | 1.04                | 0.42        | 1.01                | 0.80        |
| Leucine                | 0.91                | 0.02        | 0.89                | 0.02        | 0.90                | 0.01        | 1.06                | 0.10        | 1.06                | 0.17        | 1.02                | 0.62        |
| Valine                 | 0.97                | 0.46        | 0.89                | 0.08        | 0.89                | 0.04        | 1.06                | 0.14        | 1.06                | 0.09        | 1.04                | 0.32        |
| Cysteine               | 0.21                | 0.00        | 0.18                | 0.00        | 0.16                | 0.00        | 0.57                | 0.01        | 0.36                | 0.00        | 0.26                | 0.00        |
| N-acetylcysteine       | 0.82                | 0.10        | 0.71                | 0.02        | 0.97                | 0.81        | 0.71                | 0.18        | 0.44                | 0.00        | 0.47                | 0.00        |
| Cystine                | 1.76                | 0.11        | 2.88                | 0.00        | 2.87                | 0.00        | 2.04                | 0.01        | 2.61                | 0.00        | 2.82                | 0.00        |
| Methionine             | 0.88                | 0.02        | 0.83                | 0.01        | 0.81                | 0.00        | 1.08                | 0.08        | 1.07                | 0.12        | 1.01                | 0.77        |
| Ornithine              | 0.87                | 0.11        | 0.81                | 0.01        | 0.91                | 0.21        | 1.00                | 0.96        | 0.98                | 0.84        | 1.06                | 0.46        |
| Proline                | 0.34                | 0.00        | 0.01                | 0.00        | 0.01                | 0.00        | 0.99                | 0.86        | 1.02                | 0.74        | 0.97                | 0.28        |
| N-acetylornithine      | 0.90                | 0.57        | 1.11                | 0.48        | 0.98                | 0.79        | 1.00                |             | 1.00                |             | 1.00                |             |
| Creatine               | 1.03                | 0.52        | 1.24                | 0.00        | 1.29                | 0.04        | 0.92                | 0.26        | 0.94                | 0.35        | 0.94                | 0.38        |
| Glutamylglutamate      | 1.00                |             | 1.00                |             | 1.00                |             | 0.96                | 0.53        | 1.00                | 0.98        | 0.80                | 0.01        |
| Prolylleucine          | 1.00                |             | 1.00                |             | 1.00                |             | 1.01                | 0.58        | 1.00                | 0.91        | 0.95                | 0.04        |

|                                 |      |      |      |      |      |      |      |      |      |      |      |      |
|---------------------------------|------|------|------|------|------|------|------|------|------|------|------|------|
| <b>Leucylproline</b>            | 1.00 |      | 1.00 |      | 1.00 |      | 0.53 | 0.10 | 1.07 | 0.72 | 0.41 | 0.02 |
| <b>Pro-hydroxy-pro</b>          | 0.91 | 0.26 | 0.89 | 0.12 | 0.72 | 0.02 | 1.00 |      | 1.00 |      | 1.00 |      |
| <b>Threonylphenylalanine</b>    | 1.00 |      | 1.00 |      | 1.00 |      | 1.13 | 0.01 | 1.07 | 0.04 | 1.04 | 0.54 |
| <b>Carnosine</b>                | 1.10 | 0.34 | 1.10 | 0.21 | 1.14 | 0.06 | 1.26 | 0.03 | 1.20 | 0.19 | 1.34 | 0.03 |
| <b>Fructose</b>                 | 0.99 | 0.83 | 1.05 | 0.44 | 1.09 | 0.02 | 1.03 | 0.32 | 1.09 | 0.01 | 1.01 | 1.00 |
| <b>Maltose</b>                  | 1.00 |      | 1.00 |      | 1.00 |      | 1.78 | 0.00 | 1.83 | 0.00 | 1.89 | 0.02 |
| <b>Sorbitol</b>                 | 0.70 | 0.04 | 0.99 | 0.96 | 1.03 | 0.73 | 1.45 | 0.13 | 1.16 | 0.41 | 0.98 | 0.79 |
| <b>Glycerate</b>                | 1.13 | 0.00 | 1.21 | 0.04 | 1.35 | 0.03 | 1.15 | 0.12 | 1.27 | 0.02 | 1.20 | 0.06 |
| <b>Glucose</b>                  | 0.94 | 0.38 | 1.04 | 0.60 | 1.00 | 0.96 | 1.58 | 0.00 | 1.75 | 0.00 | 1.89 | 0.04 |
| <b>Pyruvate</b>                 | 0.58 | 0.12 | 0.34 | 0.05 | 0.14 | 0.00 | 0.59 | 0.05 | 0.27 | 0.00 | 0.26 | 0.00 |
| <b>Lactate</b>                  | 0.04 | 0.00 | 0.03 | 0.00 | 0.05 | 0.00 | 0.03 | 0.00 | 0.03 | 0.00 | 0.04 | 0.00 |
| <b>Arabitol</b>                 | 0.78 | 0.13 | 0.87 | 0.33 | 0.97 | 0.84 | 1.27 | 0.05 | 1.07 | 0.43 | 1.01 | 0.92 |
| <b>Ribitol</b>                  | 0.37 | 0.00 | 0.41 | 0.01 | 0.35 | 0.00 | 0.84 | 0.38 | 0.67 | 0.06 | 0.55 | 0.05 |
| <b>Ribose</b>                   | 0.69 | 0.02 | 0.86 | 0.37 | 1.03 | 0.87 | 1.00 |      | 1.00 |      | 1.00 |      |
| <b>Xylonate</b>                 | 2.62 | 0.00 | 3.37 | 0.00 | 3.94 | 0.00 | 1.23 | 0.09 | 1.18 | 0.17 | 1.18 | 0.17 |
| <b>Citrate</b>                  | 1.20 | 0.22 | 1.44 | 0.10 | 1.50 | 0.03 | 1.13 | 0.03 | 1.11 | 0.01 | 1.01 | 0.89 |
| <b>Succinate</b>                | 0.12 | 0.00 | 0.10 | 0.00 | 0.08 | 0.00 | 3.53 | 0.00 | 3.50 | 0.00 | 2.49 | 0.00 |
| <b>Fumarate</b>                 | 1.00 |      | 1.00 |      | 1.00 |      | 1.03 | 0.62 | 0.81 | 0.18 | 0.61 | 0.00 |
| <b>Malate</b>                   | 1.00 |      | 1.00 |      | 1.00 |      | 0.89 | 0.09 | 0.53 | 0.00 | 0.27 | 0.00 |
| <b>Oxaloacetate</b>             | 1.01 | 0.83 | 1.08 | 0.47 | 0.80 | 0.76 | 1.81 | 0.20 | 1.01 | 0.99 | 1.53 | 0.27 |
| <b>Phosphate</b>                | 0.37 | 0.00 | 0.23 | 0.00 | 0.16 | 0.00 | 0.97 | 0.28 | 0.93 | 0.04 | 0.92 | 0.02 |
| <b>Dihomo-linolenate</b>        | 1.93 | 0.00 | 2.49 | 0.00 | 2.92 | 0.00 | 1.37 | 0.03 | 1.58 | 0.07 | 1.84 | 0.00 |
| <b>Docosapentaenoate</b>        | 2.05 | 0.04 | 2.16 | 0.04 | 2.87 | 0.01 | 1.26 | 0.05 | 1.47 | 0.11 | 1.64 | 0.02 |
| <b>Docosaheptaenoate</b>        | 1.69 | 0.02 | 1.83 | 0.01 | 2.20 | 0.00 | 1.29 | 0.11 | 1.39 | 0.09 | 1.49 | 0.04 |
| <b>Isovalerate</b>              | 1.00 |      | 1.00 |      | 1.00 |      | 1.57 | 0.04 | 7.39 | 0.00 | 16.9 | 0.00 |
| <b>Caproate</b>                 | 1.20 | 0.39 | 1.42 | 0.24 | 1.38 | 0.38 | 1.08 | 0.96 | 1.51 | 0.10 | 2.34 | 0.02 |
| <b>Caprylate</b>                | 1.35 | 0.07 | 1.56 | 0.06 | 2.05 | 0.00 | 2.11 | 0.00 | 2.20 | 0.00 | 2.78 | 0.00 |
| <b>5-dodecenoate</b>            | 1.00 |      | 1.21 | 0.39 | 1.63 | 0.00 | 1.30 | 0.08 | 1.57 | 0.00 | 1.99 | 0.00 |
| <b>Myristoleate</b>             | 3.15 | 0.01 | 4.61 | 0.01 | 7.36 | 0.00 | 3.10 | 0.00 | 4.90 | 0.00 | 6.06 | 0.00 |
| <b>Arachidonate</b>             | 2.13 | 0.01 | 2.31 | 0.00 | 2.91 | 0.00 | 1.37 | 0.01 | 1.59 | 0.03 | 1.76 | 0.00 |
| <b>Ethanolamine</b>             | 1.68 | 0.05 | 1.72 | 0.01 | 2.30 | 0.00 | 0.91 | 0.53 | 1.05 | 0.83 | 1.25 | 0.14 |
| <b>Glycerophosphorylcholine</b> | 1.44 | 0.10 | 1.80 | 0.03 | 2.00 | 0.02 | 0.92 | 0.03 | 0.94 | 0.07 | 0.98 | 0.45 |
| <b>Myo-inositol</b>             | 1.02 | 0.73 | 1.03 | 0.21 | 1.08 | 0.04 | 1.18 | 0.07 | 1.08 | 0.43 | 1.07 | 0.92 |

|                                            |      |      |      |      |      |      |      |      |      |      |      |      |
|--------------------------------------------|------|------|------|------|------|------|------|------|------|------|------|------|
| <b>1-palmitoyl-glycerophosphocholine</b>   | 0.93 | 0.99 | 1.46 | 0.16 | 1.08 | 0.86 | 1.69 | 0.02 | 1.59 | 0.03 | 1.04 | 0.12 |
| <b>1-stearoyl-glycerophosphocholine</b>    | 0.93 | 0.88 | 1.45 | 0.17 | 1.19 | 0.71 | 1.75 | 0.01 | 1.75 | 0.01 | 1.42 | 0.11 |
| <b>1-oleoyl-glycerophosphocholine</b>      | 0.84 | 0.81 | 1.41 | 0.20 | 1.12 | 0.82 | 1.78 | 0.02 | 1.60 | 0.04 | 1.43 | 0.18 |
| <b>1-arachidonoylglycerophosphocholine</b> | 0.71 | 0.65 | 1.81 | 0.12 | 1.18 | 0.64 | 1.61 | 0.04 | 1.33 | 0.17 | 1.15 | 0.51 |
| <b>Xanthine</b>                            | 1.17 | 0.00 | 1.23 | 0.00 | 1.34 | 0.00 | 0.93 | 0.50 | 0.89 | 0.30 | 0.90 | 0.32 |
| <b>Xanthosine</b>                          | 1.02 | 0.58 | 1.16 | 0.01 | 1.25 | 0.01 | 0.92 | 0.10 | 0.95 | 0.39 | 0.83 | 0.02 |
| <b>Hypoxanthine</b>                        | 1.69 | 0.00 | 2.06 | 0.00 | 2.42 | 0.00 | 1.00 |      | 1.00 |      | 1.00 |      |
| <b>Inosine</b>                             | 1.16 | 0.01 | 1.10 | 0.04 | 1.08 | 0.10 | 0.78 | 0.09 | 0.77 | 0.16 | 0.58 | 0.00 |
| <b>2'-deoxyinosine</b>                     | 0.94 | 0.12 | 0.89 | 0.02 | 0.81 | 0.00 | 1.00 |      | 1.00 |      | 1.00 |      |
| <b>Adenine</b>                             | 0.93 | 0.30 | 0.94 | 0.13 | 0.86 | 0.09 | 1.02 | 0.80 | 0.85 | 0.14 | 0.84 | 0.09 |
| <b>Adenosine</b>                           | 0.03 | 0.00 | 0.05 | 0.00 | 0.04 | 0.00 | 1.00 |      | 1.00 |      | 1.00 |      |
| <b>Adenosine 3'-monophosphate</b>          | 1.00 |      | 1.00 |      | 1.00 |      | 1.44 | 0.02 | 1.51 | 0.01 | 1.36 | 0.03 |
| <b>Adenosine 5'-monophosphate</b>          | 2.19 | 0.00 | 2.48 | 0.00 | 1.74 | 0.01 | 1.17 | 0.03 | 1.34 | 0.00 | 1.39 | 0.00 |
| <b>Guanine</b>                             | 1.98 | 0.00 | 2.15 | 0.00 | 2.21 | 0.00 | 0.65 | 0.07 | 0.51 | 0.03 | 0.59 | 0.04 |
| <b>Guanosine</b>                           | 0.91 | 0.26 | 0.96 | 0.47 | 0.89 | 0.23 | 1.44 | 0.01 | 1.19 | 0.21 | 1.10 | 0.44 |
| <b>2'-Deoxyguanosine</b>                   | 0.73 | 0.03 | 0.70 | 0.01 | 0.55 | 0.01 | 1.00 |      | 1.00 |      | 1.00 |      |
| <b>1-methylguanosine</b>                   | 0.93 | 0.49 | 0.97 | 0.83 | 0.94 | 0.61 | 1.00 |      | 1.00 |      | 1.00 |      |
| <b>Urate</b>                               | 0.76 | 0.16 | 0.71 | 0.03 | 0.63 | 0.02 | 0.98 | 0.90 | 0.94 | 0.50 | 0.84 | 0.17 |
| <b>Uridine</b>                             | 0.99 | 0.86 | 1.03 | 0.47 | 0.98 | 0.75 | 1.20 | 0.18 | 1.25 | 0.14 | 1.30 | 0.02 |
| <b>Nicotinamide</b>                        | 1.06 | 0.23 | 1.25 | 0.02 | 1.04 | 0.76 | 1.13 | 0.32 | 1.56 | 0.02 | 1.34 | 0.07 |
| <b>Nicotinamide adenine dinucleotide</b>   | 0.25 | 0.00 | 0.25 | 0.00 | 0.25 | 0.00 | 0.26 | 0.00 | 0.23 | 0.00 | 0.23 | 0.00 |
| <b>Adenosine 5'diphosphoribose</b>         | 0.77 | 0.06 | 0.77 | 0.06 | 0.77 | 0.06 | 1.03 | 0.86 | 0.74 | 0.05 | 0.63 | 0.01 |
| <b>Trigonelline</b>                        | 0.37 | 0.00 | 0.27 | 0.00 | 0.27 | 0.00 | 1.48 | 0.33 | 1.04 | 0.99 | 1.24 | 0.43 |

|                       |      |      |      |      |      |      |      |      |      |      |      |      |
|-----------------------|------|------|------|------|------|------|------|------|------|------|------|------|
| <b>Pantothenate</b>   | 0.97 | 0.77 | 1.04 | 0.54 | 0.91 | 0.40 | 1.18 | 0.02 | 0.99 | 0.81 | 1.05 | 0.36 |
| <b>Hippurate</b>      | 1.04 | 0.29 | 1.05 | 0.21 | 1.07 | 0.04 | 1.04 | 0.48 | 1.05 | 0.36 | 1.00 | 0.93 |
| <b>Glycolate</b>      | 0.60 | 0.09 | 1.17 | 0.41 | 0.72 | 0.26 | 1.56 | 0.04 | 1.26 | 0.28 | 1.22 | 0.25 |
| <b>Phenol sulfate</b> | 1.02 | 0.67 | 0.99 | 0.86 | 1.10 | 0.01 | 0.95 | 0.68 | 1.06 | 0.60 | 1.06 | 0.48 |
| <b>Daidzein</b>       | 1.00 |      | 1.00 |      | 1.00 |      | 1.18 | 0.02 | 1.31 | 0.00 | 1.28 | 0.00 |
| <b>Genistein</b>      | 1.00 |      | 1.00 |      | 1.00 |      | 1.12 | 0.00 | 1.04 | 0.11 | 1.08 | 0.07 |
| <b>Erythritol</b>     | 0.97 | 0.68 | 0.94 | 0.46 | 1.01 | 0.87 | 1.11 | 0.00 | 1.13 | 0.07 | 1.04 | 0.64 |

35 **Table S2:** An overview of the average feed intake per gerbil per day and the average weight gain  
 36 per gerbil per week in the non-infected control groups (Control) and in gerbils experimentally  
 37 infected with *Helicobacter suis* (Infected), fed a non-supplemented diet (Std), a diet  
 38 supplemented with 5% glutamine (Gln) or a diet supplemented with 0.8% glutathione (GSH).  
 39 Weight is expressed in grams  $\pm$  standard deviation.

|                 | <b>Diet</b> | <b>Estimated average feed intake per<br/>gerbil per day</b> | <b>Average weight gain per gerbil<br/>per week</b> |
|-----------------|-------------|-------------------------------------------------------------|----------------------------------------------------|
| <b>Control</b>  | <b>Std</b>  | 3.4                                                         | 1.50 $\pm$ 0.16                                    |
|                 | <b>Gln</b>  | 3.9                                                         | 1.65 $\pm$ 0.12                                    |
|                 | <b>GSH</b>  | 3.8                                                         | 1.08 $\pm$ 0.21                                    |
| <b>Infected</b> | <b>Std</b>  | 3.6                                                         | 1.43 $\pm$ 0.31                                    |
|                 | <b>Gln</b>  | 3.7                                                         | 1.53 $\pm$ 0.43                                    |
|                 | <b>GSH</b>  | 3.9                                                         | 1.33 $\pm$ 0.30                                    |

40

41



42 **TABLE S3:** Overall inflammation in the stomach of gerbils experimentally infected with  
 43 *Helicobacter suis*. <sup>1</sup>The gerbils received either a standard diet, a standard diet supplemented with  
 44 5% glutamine or a standard diet supplemented with 0.8% glutathione. <sup>2</sup>Inflammation scores: 0 =  
 45 no inflammation; 1 = mild diffuse infiltration of lymphocytes or presence of one small aggregate  
 46 of inflammatory cells; 2 = moderate diffuse infiltration and/or the presence of 2-4 inflammatory  
 47 aggregates; 3 = marked diffuse infiltration and/or the presence of at least 5 inflammatory  
 48 aggregates. <sup>3</sup>Displayed are the number of animals out of ten animals in each infected group with a  
 49 specific overall inflammation score.

| <b>Groups<sup>1</sup></b> | <b>Inflammation score antrum</b> |          |          |          | <b>Inflammation score corpus</b> |          |          |          |
|---------------------------|----------------------------------|----------|----------|----------|----------------------------------|----------|----------|----------|
|                           | <b>0<sup>2</sup></b>             | <b>1</b> | <b>2</b> | <b>3</b> | <b>0</b>                         | <b>1</b> | <b>2</b> | <b>3</b> |
| <b>Standard</b>           | 0 <sup>3</sup>                   | 0        | 4        | 6        | 7                                | 3        | 0        | 0        |
| <b>Glutamine</b>          | 1                                | 2        | 4        | 3        | 8                                | 2        | 0        | 0        |
| <b>Glutathione</b>        | 7                                | 3        | 0        | 0        | 9                                | 1        | 0        | 0        |
